# Supplementary material for: Inclusion Complexes of a New Family of Non-Ionic Amphiphilic Dendrocalix[4]arene and Poorly Water-Soluble Drugs Naproxen and Ibuprofen
Source: PubMed Central journal article supplement (PMC6154630; doi:10.3390/molecules22050783), 2017-05-11
Supplement: molecules-22-00783-s001.pdf [file molecules-22-00783-s001.pdf]

## Supporting information

# Inclusion Complexes of a New Family of Non-Ionic Amphiphilic Dendrocalix[4]arene and Poorly Water-Soluble Drugs Naproxen and Ibuprofen

Khalid Khan <sup>1,\*</sup>, Syed Lal Badshah <sup>1</sup>, Nasir Ahmad <sup>1</sup>, Haroon Ur Rashid <sup>2</sup> and Yahia Mabkhot <sup>3,\*</sup>

<sup>1</sup> Department of Chemistry, Islamia College University, Peshawar 25120, Khyber Pukhtunkhwa, Pakistan; shahbiochemist@gmail.com (S.L.B.); nasirshah121@yahoo.com (N.A.)

<sup>2</sup> Department of Chemistry, Sarhad University of Science and Technology, Peshawar 25120, Khyber Pukhtunkhwa, Pakistan; haroongold@gmail.com

<sup>3</sup> Department of Chemistry, College of Science, King Saud University, Riyadh 11495, Saudi Arabia

\* Correspondence: drkhalidchem@yahoo.com (K.K.); yahia@ksu.edu.sa (Y.M.); Tel.: +92-312-772-2787 (K.K.); +966-11-467-5898 (Y.M.)

**Note:** The below synthesis part was published in the article “Khan, K.; Huang, H.; Zheng, Y.-S. Design, Synthesis, and Transport Potential of a New Family of Nonionic Amphiphilic Dendro-calix[4]arene. *Curr. Org. Chem.* **2012**, *16*, 2745–2751.” But here we add it again so that it is available to the general public as “Molecule” is an open source journal on the request of reviewers and editor.

### Scheme S1

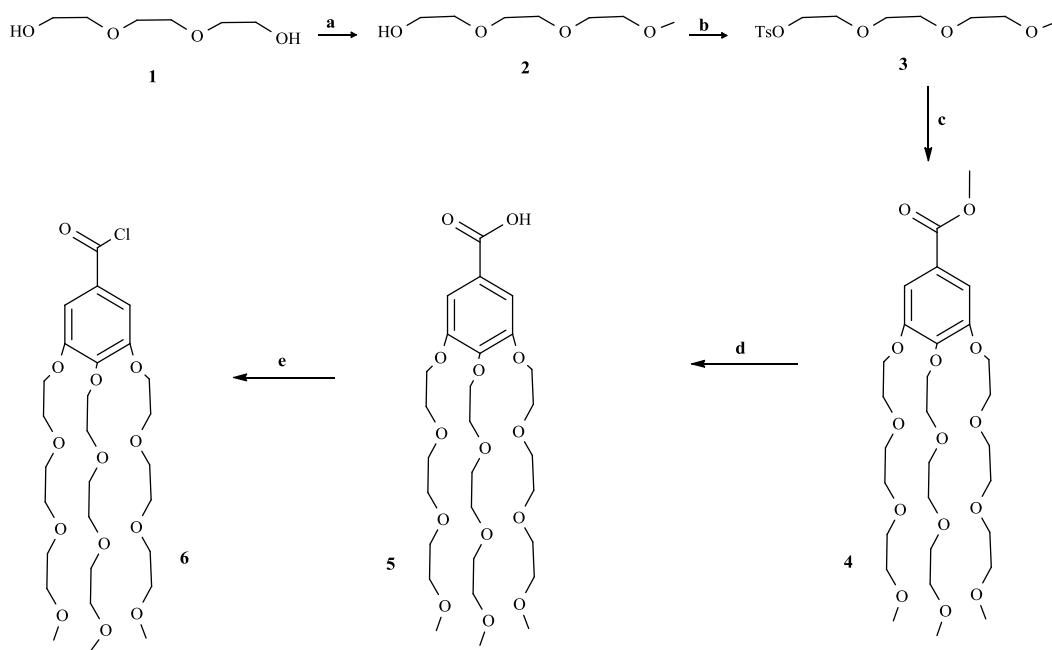

**Scheme S1.** Synthesis of architecture 6 (3,4,5-TMEE benzoyl chloride). (a)  $(\text{CH}_3)_2\text{SO}_4$ , NaOH, 120 °C; (b) NaOH aq, TsCl, THF, 0 °C; (c)  $\text{C}_7\text{H}_8\text{O}_5$ , KI,  $\text{K}_2\text{CO}_3$ , Acetone, reflux; (d) NaOH,  $\text{H}_2\text{O}$ , reflux; (e)  $\text{SOCl}_2$ , reflux.

### Scheme S2

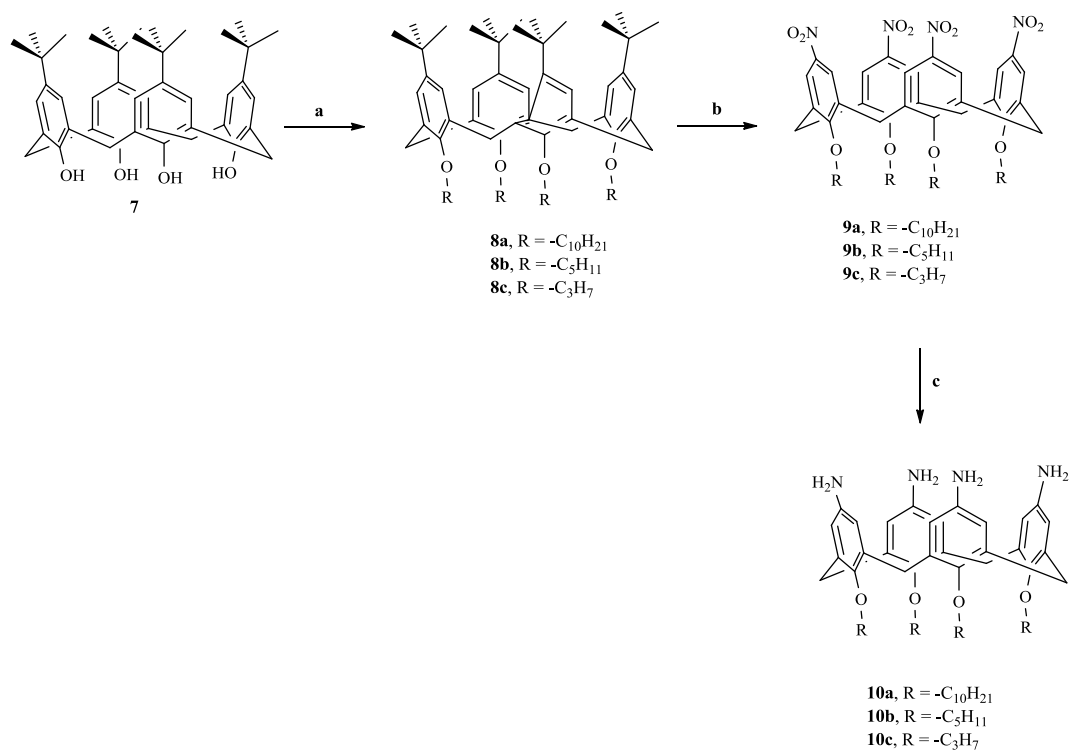

**Scheme S2.** Synthesis of 10a–c. (a) RBr, NaH, DMF, 85 °C; (b) HNO<sub>3</sub>, CHCOOH, CH<sub>2</sub>Cl<sub>2</sub>, 0 °C; (c) 10%Pd/C, CH<sub>2</sub>Cl<sub>2</sub>, Ethanol, reflux.

### Scheme S3

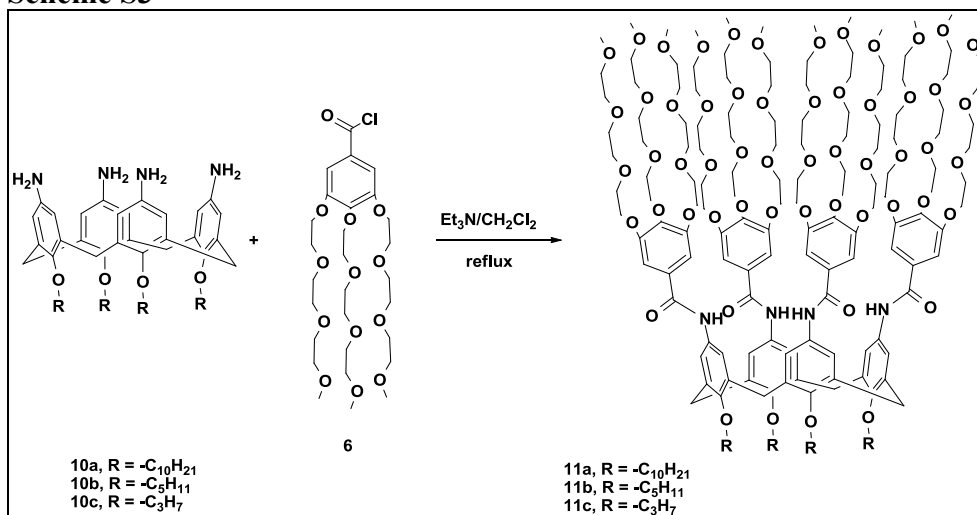

**Scheme S3.** Synthesis of compounds 11a–c (Compounds 1a–c in original article).

### Scheme S4

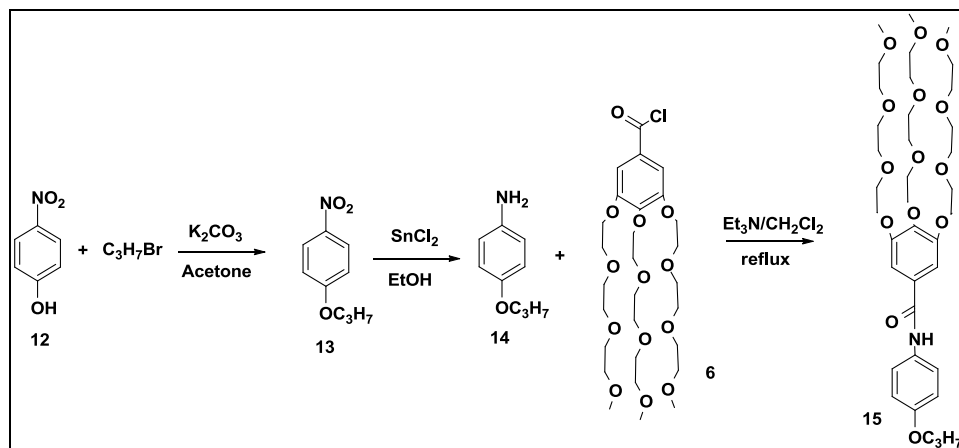

**Scheme S4.** Synthesis of compound 15 (Compound 2 in original article).

### Synthesis of Surfactants

**General procedure of synthesis of compounds 11a–c (Compounds 1a–c in Original article):** To a solution of **6** (1.0 g, 1.6 mmol) in  $\text{CH}_2\text{Cl}_2$  (10 mL) cooled with an ice bath was dropped the solution of **10a–c** (0.3 g, 0.29 mmol) and redistilled triethylamine ( $\text{Et}_3\text{N}$ ) (0.3 mL, 2.2 mmol) in  $\text{CH}_2\text{Cl}_2$  (15 mL). After finished addition, the ice bath was removed and the mixture was refluxed for about 3.0 h. The mixture was evaporated to dryness using a rotary evaporator under reduced pressure. The residue was purified by flash column chromatography (silica gel,  $\text{CHCl}_3/\text{CH}_3\text{OH}$  80:1).

**[11a=1a]:** Colorless or light yellow, yield: (0.45 g, 46%)  $^1\text{H-NMR}$  (400 MHz,  $\text{CDCl}_3$ )  $\delta$  8.26 (s, 4H, CONH), 7.20=7.0 (br s, 16H, ArH), 4.49 (d,  $J = 13.2$  Hz, 4H,  $\text{ArCH}_2\text{Ar}$ ), 4.20–3.40 (m, 152H,  $\text{CH}_2\text{O}$ ), 3.36, 3.31 (2s, 36H,  $\text{OCH}_3$ ), 3.21 (D,  $J = 13.2$  Hz, 4H,  $\text{ArCH}_2\text{Ar}$ ), 1.96 (s, 8H,  $\text{ArOCH}_2\text{CH}_2\text{CH}_2$ ), 1.45–1.20 (m, 56H,  $\text{OCH}_2\text{CH}_2(\text{CH}_2)_7\text{CH}_3$ ), 0.89 (t,  $J = 6.4$  Hz, 12H,  $\text{CH}_2\text{CH}_3$ );  $^{13}\text{C-NMR}$  (100 MHz,  $\text{CDCl}_3$ )  $\delta$  165.1, 153.5, 152.4, 141.7, 135.2, 132.4, 129.8, 121.3, 107.6, 75.5, 72.4, 72.0, 71.9, 70.68, 70.66, 70.60, 70.56, 70.4, 69.8, 69.2, 59.0, 58.9, 32.0, 31.4, 30.3, 30.0, 29.8, 29.5, 26.4, 22.7, 14.1); IR (KBr)  $\nu$  3308, 2925, 1663, 1584, 1536, 1495, 1468, 1426  $\text{cm}^{-1}$ ; +TOF HRMS  $m/z$  calcd for  $(\text{C}_{180}\text{H}_{294}\text{N}_4\text{O}_{56})/2$  1704.0140  $[\text{M} + 2\text{H}]^{2+}/2$ , found  $[\text{M} + 2\text{H}]^{2+}/2$  1704.0179.

**[11b=1b]:** Colorless or light yellow, yield: (0.65 g, 53%)  $^1\text{H-NMR}$  (400 MHz,  $\text{CDCl}_3$ )  $\delta$  8.41(s, 4H, CONH), 7.20=7.0 (br s, 16H, ArH), 4.50 (d,  $J = 13.2$  Hz, 4H,  $\text{ArCH}_2\text{Ar}$ ), 4.20–3.40 (m, 152H,  $\text{CH}_2\text{O}$ ), 3.36, 3.30 (2s, 36H,  $\text{OCH}_3$ ), 3.22 (D,  $J = 13.2$  Hz, 4H,  $\text{ArCH}_2\text{Ar}$ ), 1.97 (s, 8H,  $\text{ArOCH}_2\text{CH}_2\text{CH}_2$ ), 1.41–1.20 (m, 16H,  $\text{OCH}_2\text{CH}_2(\text{CH}_2)_2\text{CH}_3$ ), 0.96 (t,  $J = 6.4$  Hz, 12H,  $\text{CH}_2\text{CH}_3$ );  $^{13}\text{C-NMR}$  (100 MHz,  $\text{CDCl}_3$ )  $\delta$  165.0, 153.4, 152.2, 141.4, 135.1, 132.4, 129.8, 121.2, 107.4, 75.4, 72.3, 71.9, 71.8, 70.61, 70.59, 70.54, 70.31, 69.69, 69.03, 59.0, 58.84, 31.34, 30.91, 22.81, 14.18; IR (KBr)  $\nu$  3488, 2927, 1650, 1588, 1543, 1472, 1468, 1427  $\text{cm}^{-1}$ ; +TOF HRMS  $m/z$  calcd for  $(\text{C}_{160}\text{H}_{252}\text{N}_4\text{O}_{56})/2$  1562.8497  $[\text{M} + 2\text{H}]^{2+}/2$ , found  $[\text{M} + 2\text{H}]^{2+}/2$  1562.1490.

**[11c=1c]:** Colorless or light yellow, yield: (0.60 g, 42%)  $^1\text{H-NMR}$  (400 MHz,  $\text{CDCl}_3$ )  $\delta$  8.31 (s, 4H, CONH), 7.3=7.1 (br s, 16H, ArH), 4.51 (d,  $J = 13.2$  Hz, 4H,  $\text{ArCH}_2\text{Ar}$ ), 4.22–3.44 (m, 152H,  $\text{CH}_2\text{O}$ ), 3.37–3.35 (2s, 36H,  $\text{OCH}_3$ ), 3.29 (D,  $J = 13.2$  Hz, 4H,  $\text{ArCH}_2\text{Ar}$ ), 1.98 (s, 8H,  $\text{ArOCH}_2\text{CH}_2\text{CH}_3$ ), 0.98 (t,  $J = 6.4$  Hz, 12H,  $\text{CH}_2\text{CH}_3$ );  $^{13}\text{C-NMR}$  (100 MHz,  $\text{CDCl}_3$ )  $\delta$  164.7, 153.0, 152.0, 140.35, 135.0, 133.0, 130.0, 121.26, 107.0, 77.83, 77.2, 76.8, 72.05, 71.63, 70.28, 70.18, 70.09, 70.0, 68.5, 60.10, 58.71, 58.63, 31.11, 14.03; IR (KBr)  $\nu$  3443, 2925, 1648, 1588, 1542, 1468, 1427  $\text{cm}^{-1}$ ; +TOF HRMS  $m/z$  calcd for  $(\text{C}_{152}\text{H}_{236}\text{N}_4\text{O}_{56})/2$  1506.7870  $[\text{M} + 2\text{H}]^{2+}/2$ , found  $[\text{M} + 2\text{H}]^{2+}/2$  1506.0871.

### 3.2. Synthesis of Compound 13 (Compound 15=2 in Original Article)

Reaction conditions and workup were the same as described above for the **11a–c**, while had different molar ratio with **6** (2.5 g, 4 mmol) and **12** (0.50 g, 3.3 mmol). Light yellow, yield: (2 g, 80%)  $^1\text{H-NMR}$  (400 MHz,  $\text{CDCl}_3$ )  $\delta$  8.22 (s, 1H, CONH), 7.57 (d,  $J = 8.8$  Hz, 2H, ArH), 7.28=7.20 (br s, 2H, Ar), 6.8 (d,  $J = 8.8$  Hz, 2H, ArH), 4.19–3.90 (m, 38H,  $\text{CH}_2\text{O}$ ), 3.37–3.32 (2s, 9H,  $\text{OCH}_3$ ), 1.8 (s, 2H,  $\text{ArOCH}_2\text{CH}_2\text{CH}_3$ ), 1.03 (t,  $J = 7.2$  Hz, 3H,  $\text{CH}_2\text{CH}_3$ );  $^{13}\text{C-NMR}$  (100 MHz,  $\text{CDCl}_3$ )  $\delta$

165.29, 155.96, 152.47, 141.65, 131.33, 130.23, 122.22, 114.71, 107.67, 77.07, 76.75, 72.36, 71.93, 71.88, 70.61, 70.55, 70.50, 70.43, 69.78, 69.13, 58.98, 58.91, 22.60, 10.50; IR (KBr)  $\nu$  3478, 2928, 1650, 1587, 1508, 1460, 1427 ; +TOF HRMS  $m/z$  calcd for  $(C_{37}H_{59}NO_{14})/2$  370.93133  $[M + 2H^+]^{2+}/2$ , found  $[M + 2H^+]^{2+}/2$  370.69678.
